# Supplementary figures and images for: Attenuation of the Counter-Regulatory Glucose Response in CVLM C1 Neurons: A Possible Explanation for Anorexia of Aging
Source: MDPI journal article supplement (doi:10.3390/biom12030449), 2022-03-14

**A**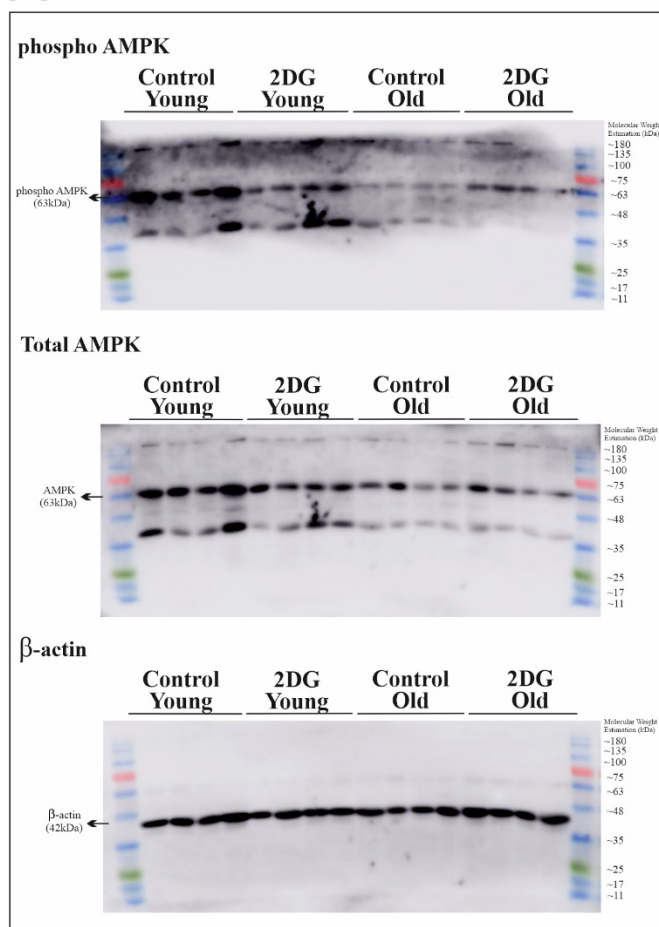**B**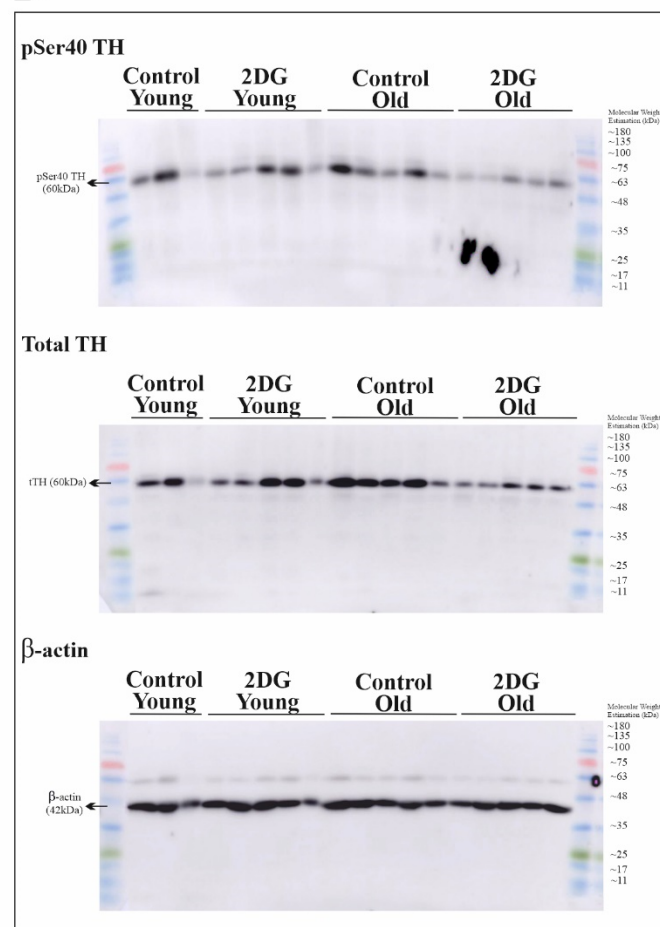**C**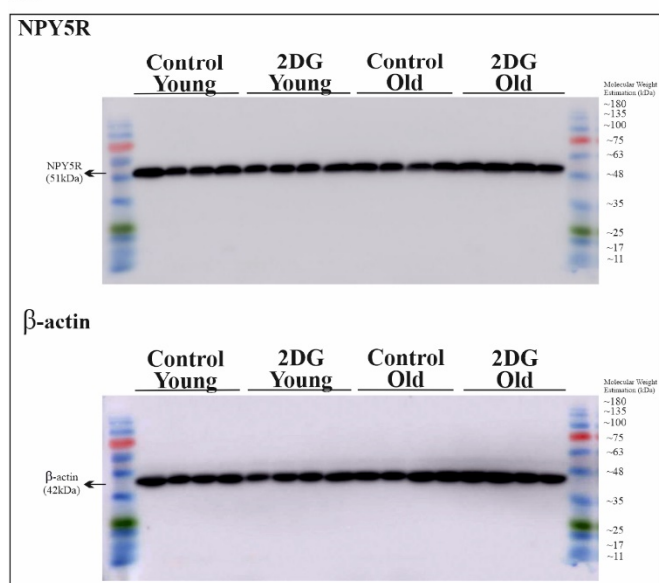

**Figure S1.** Representative blots of AMPK (A), TH (B), and NPY5R (C).

Supplement: s1 [file s1]
